# Supplementary material for: Glecaprevir/Pibrentasvir in patients with chronic HCV genotype 3 infection: An integrated phase 2/3 analysis
Source: PubMed Central journal article supplement — J Viral Hepat. 2018 Dec 11;26(3):337–49. doi: 10.1111/jvh.13038 (PMC7379735; doi:10.1111/jvh.13038), 2018-12-11
Supplement: JVH-26-337-s002.pdf [file JVH-26-337-s002.pdf]

## Online Supporting Information

### Glecaprevir/Pibrentasvir in Patients with Chronic HCV Genotype 3 Infection: An Integrated Phase 2/3 Analysis

Steven Flamm, David Mutimer, Armen Asatryan, Stanley Wang, Jurgen Rockstroh, Yves Horsmans, Paul Y Kwo, Ola Weiland, Erica Villa, Jeong Heo, Edward Gane, Stephen Ryder, Tania Welzel, Peter J Ruane, Kosh Agarwal, Teresa I Ng, Zhenyi Xue, Sandra S Lovell, Preethi Krishnan, Sarah Kopecky-Bromberg, Roger Trinh, Federico J Mensa, David L Wyles

#### Contents

|                                                                                           |   |
|-------------------------------------------------------------------------------------------|---|
| Key Patient Eligibility Criteria.....                                                     | 2 |
| Cirrhosis Determination (Phase 3 studies and SURVEYOR-2 Part 2) .....                     | 2 |
| Resistance Analyses .....                                                                 | 3 |
| Table S1. Differential Patient Eligibility Criteria in Phase 2 or 3 Clinical Trials ..... | 4 |
| Table S2. Patients Excluded in the mITT Analysis .....                                    | 5 |

Glecaprevir was identified by AbbVie and Enanta Pharmaceuticals.

## Key Patient Eligibility Criteria\*

At least 18 years of age

Chronic hepatitis C virus genotype 3 infection (HCV RNA at least 1,000 IU/mL at screening)

Absence of coinfection with hepatitis B virus or infection with multiple HCV genotypes

Absence of cirrhosis or presence of compensated (Child-Pugh A) cirrhosis

HCV treatment naïve or experienced with interferon or pegylated IFN with or without ribavirin, or sofosbuvir plus ribavirin with or without pegylated IFN

Patients with stage 4 or 5 chronic kidney disease (EXPEDITION-4), HIV coinfection (EXPEDITION-2), or post-liver/kidney transplant (MAGELLAN-2) were included

\*Differences in criteria between Phase 2 and Phase 3 studies are listed in Table S1.

## Cirrhosis Determination (Phase 3 studies and SURVEYOR-II Part 2)

### No Cirrhosis:

- A liver biopsy within 24 months prior to or during screening demonstrating the absence of cirrhosis, e.g., a METAVIR, Batts-Ludwig, Knodell (Histologic Activity Index; Fibrosis component), IASL, Scheuer, or Laennec fibrosis score of  $\leq 3$ , Ishak (modified Knodell) fibrosis score of  $\leq 4$ ; or
- A FibroScan score of  $< 12.5$  kPa within 6 months prior to Screening or during the Screening Period; or
  - Patients with indeterminate FibroScan score ( $12.5 \leq \text{score} < 14.6$ ) must have qualifying liver biopsy
- A screening FibroTest score of  $\leq 0.48$  and Aspartate Aminotransferase to Platelet Ratio Index (APRI)  $< 1$ ;
  - Patients with non-qualifying/conflicting FibroTest and APRI results (eg, FibroTest  $\leq 0.48$ , but APRI  $\geq 1$ ) must have a qualifying liver FibroScan or biopsy

### Cirrhosis:

- Histologic diagnosis of cirrhosis on a previous liver biopsy (eg, METAVIR, Batts-Ludwig, Knodell, IASL, Scheuer, or Laennec fibrosis score of  $\leq 3$  or Ishak fibrosis score of  $> 4$ ); or
- Previous FibroTest score  $\geq 0.75$  and an APRI  $> 2$ ; or

- Patients with indeterminate FibroTest ( $0.48 < \text{results} < 0.75$ ), or conflicting FibroTest and APRI results must have a qualifying liver Fibroscan or biopsy
- Previous FibroScan score  $\geq 14.6$  kPa;
  - Patients with indeterminate FibroScan score ( $12.5 \leq \text{score} < 14.6$ ) must have qualifying liver biopsy

**Note:** SURVEYOR-II Part 1 (Phase 2) enrolled patients without cirrhosis only and used same criteria except for FibroTest and APRI cutoffs (Table S1) and no specification of indeterminate ranges for FibroTest or FibroScan.

## Resistance Analyses

For HCV resistance analysis, we define a polymorphism as a baseline amino acid difference relative to the appropriate reference sequence. Regions encoding full-length NS3/4A or NS5A were sequenced by next generation sequencing from available baseline samples from all patients, and on the first available post-baseline sample with HCV RNA  $\geq 1000$  IU per milliliter from patients who experienced virologic failure. Detection of polymorphisms at baseline and substitutions at the time of virologic failure was done using a 15% detection threshold. For patients who experienced virologic failure, polymorphisms at baseline and substitutions at the time of failure were examined using an extended list of amino acid positions: 36, 43, 54, 55, 56, 80, 155, 156, 166, 168 in NS3, and 24, 28, 29, 30, 31, 32, 58, 92, 93 in NS5A.

**Table S1. Differential Patient Eligibility Criteria in Phase 2 or 3 Clinical Trials**

|                                               | Phase 2 Trials   | Phase 3 Trials        |
|-----------------------------------------------|------------------|-----------------------|
| <b>General characteristics</b>                |                  |                       |
| Age                                           | 18 – 70          | ≥18                   |
| BMI (kg/m <sup>2</sup> )                      | ≥18 to <38       | ≥18                   |
| HCV RNA (IU/mL)                               | >10,000          | ≥1,000                |
| Prior treatment experience                    | IFN, pegIFN, RBV | IFN, pegIFN, RBV, SOF |
| <b>Absence of cirrhosis*</b>                  |                  |                       |
| Fibroscan (kPa)                               | <12.5            | <12.5                 |
| Fibrotest                                     | ≤0.72            | ≤0.48                 |
| APRI                                          | ≤2               | <1                    |
| <b>Positive urine drug test exclusionary?</b> | Yes              | No                    |

APRI, AST-to-platelet ratio index ; BMI, body-mass index; IFN, interferon; pegIFN, pegylated interferon; RBV, ribavirin; SOF, sofosbuvir

\*Fibrotest and APRI criteria for SURVEYOR-2 Part 2 (Phase 2) were the same used in phase 3 trials

**Table S2. Patients Excluded in the mITT Analysis**

|    | Treatment History        | Cirrhosis Status | Treatment Duration | Reason for Non-Response   | DAA Adherent*?         |
|----|--------------------------|------------------|--------------------|---------------------------|------------------------|
| 1  | Naïve                    | No cirrhosis     | 12 weeks           | Treatment discontinuation | No                     |
| 2  | Naïve                    | No cirrhosis     | 8 weeks            | Missing SVR12 data        | No                     |
| 3  | Naïve                    | No cirrhosis     | 8 weeks            | OTVF                      | No<br>(#17 in Table 4) |
| 4  | Naïve                    | No cirrhosis     | 12 weeks           | Treatment discontinuation | Yes                    |
| 5  | Naïve                    | No cirrhosis     | 12 weeks           | Missing SVR12 data        | No                     |
| 6  | Naïve                    | No cirrhosis     | 12 weeks           | Treatment discontinuation | No                     |
| 7  | Naïve                    | No cirrhosis     | 8 weeks            | Missing SVR12 data        | Yes                    |
| 8  | Naïve                    | No cirrhosis     | 12 weeks           | Missing SVR12 data        | Yes                    |
| 9  | Naïve                    | No cirrhosis     | 12 weeks           | Treatment discontinuation | No                     |
| 10 | Naïve                    | No cirrhosis     | 12 weeks           | Relapse                   | No<br>(#12 in Table 4) |
| 11 | Naïve                    | No cirrhosis     | 12 weeks           | Missing SVR12 data        | No                     |
| 12 | Naïve                    | No cirrhosis     | 12 weeks           | Missing SVR12 data        | No                     |
| 13 | Naïve                    | Cirrhosis        | 12 weeks           | OTVF                      | No<br>(#21 in Table 4) |
| 14 | Naïve                    | No cirrhosis     | 8 weeks            | Missing SVR12 data        | Yes                    |
| 15 | Experienced <sup>†</sup> | No cirrhosis     | 12 weeks           | Relapse                   | No<br>(#1 in Table 4)  |
| 16 | Naïve                    | No cirrhosis     | 12 weeks           | Missing SVR12 data        | Yes                    |
| 17 | Naïve                    | Cirrhosis        | 12 weeks           | Missing SVR12 data        | No                     |
| 18 | Naïve                    | No cirrhosis     | 8 weeks            | Missing SVR12 data        | No                     |
| 19 | Experienced <sup>†</sup> | Cirrhosis        | 16 weeks           | OTVF                      | No<br>(#9 in Table 4)  |

SVR12, sustained virologic response 12 weeks post-treatment; OTVF, on-treatment virologic failure  
\* DAA adherence was calculated as the percentage of tablets taken (determined by pill counts at study visits from week 4, 8, 12 [where applicable] and 16 [where applicable]) relative to the total expected number of tablets, where adherence needed to be between 80% and 120% at each 4-week dispensation interval (values below 80% and above 120% were considered non-adherent)  
<sup>†</sup>Experienced with pegIFN/RBV
